# Supplementary material
Source: PubMed Central journal article supplement (PMC3845088)
Supplement: NIHMS527789-supplement-1_si_001.pdf [file NIHMS527789-supplement-1_si_001.pdf]

# Probing Nanoscale Self-Assembly of Non-Fluorescent Small Molecules inside Live Mammalian Cells

Yuan Gao, Cristina Berciu, Yi Kuang, Junfeng Shi, Daniela Nicastro and Bing Xu\*

## Supporting Information

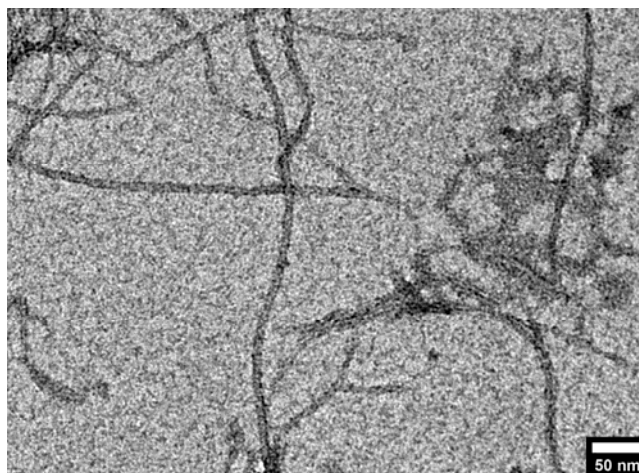

**Figure S1.** Typical TEM image of 235  $\mu\text{M}$  of **1a** treated with 6 U/mL of ALP. The width of the fibers in this low concentration of **1b** is  $11.0 \pm 1.6$  nm which is close to that of nanofibers from other gel samples.

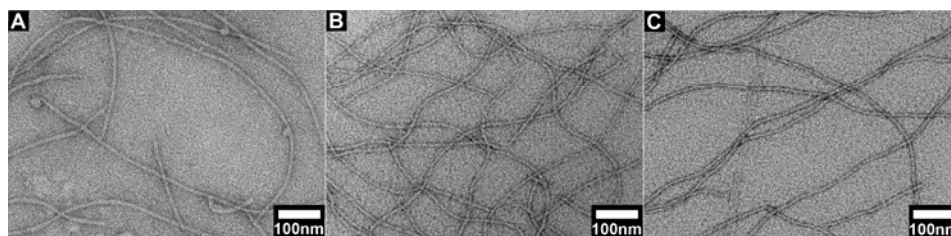

**Figure S2.** Typical TEM images of hydrogel (A) 0.6 wt% **2b**, (B) 0.6 wt% **1b** and (C) 2  $\mu\text{M}$  of **2b** in 5 mM of **1b** (TEM images are negatively stained by 2% UA in aqueous solution). The fibers are long and thin with a uniform diameter of  $11 \pm 2$  nm which was calculated by image-J. The morphology of the fibers is almost identical, indicating that **2b** and **1b** can co-self assemble into nanofibers.

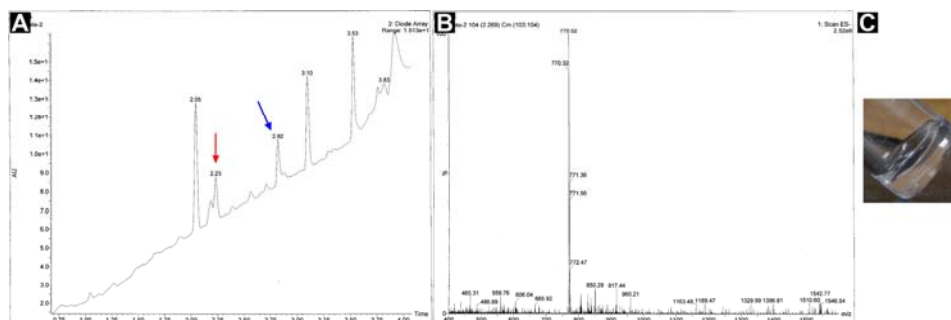

**Figure S3.** LC-MS result of cell lysate. After taken confocal images, the cells were lysed immediately by replacing culture media with DI water and freeze-drying the sample in vacuum. The freeze dried powder was re-dissolved in water/acetonitrile (1:1 v/v) and filtered before injection into LC-MS. (A) After mapping **1a** and **1b** by mass ESI<sup>-</sup>, we found that the retention time of **1a** and **1b** was around 2.23 min in the LC spectrum (red arrow). (B) The ESI<sup>-</sup> mass spectrum of the peak marked 2.23 in (A) showed most of them are **1b** anion (MW = 770.32 Da) with a small amount of **1a** anion (MW = 850.28 Da) (<10% by intensity). We also found the existence of at least one degradation product from **1b** which was embedded in the peak indicated by a blue arrow which had a molecule weight of 480.20 Da. (C) The optical image of **1b** hydrogel which formed at 4 °C (cold room) after mixing the ALP enzyme (10 U/mL) and **1a** solution (2 mg/mL or 2.35 mM in PBS buffer) for 2 hours. Both the ALP and **1a** were stored in cold room for the temperature 4°C before mixing.

**Table 1.** The determination of the concentration of gelator inside HeLa cells by LC-MS.

|                                               | Cell lysate                               |                                           |                                          |                        |
|-----------------------------------------------|-------------------------------------------|-------------------------------------------|------------------------------------------|------------------------|
|                                               | 37 °C, 48h<br>Cell No=2*10 <sup>5</sup> ; | 37 °C, 20h<br>Cell No=1*10 <sup>6</sup> ; | 4 °C, 20h<br>Cell No=1*10 <sup>6</sup> ; |                        |
| Sample Volume / μL                            | 200                                       | 300                                       | 300                                      |                        |
| Injection Volume / μL                         | 40                                        | 20                                        | 20                                       |                        |
| Integration Area / μV*sec                     | 3397876 <sup>a</sup><br>( <b>1b</b> )     | 2759608 <sup>a</sup><br>( <b>1b</b> )     | 21321266<br>( <b>1b</b> )                | 32191816 ( <b>1a</b> ) |
| Calculated conc. inside cells <sup>b, c</sup> | 0.26-0.94<br>mg/mL                        | 0.13-0.46<br>mg/mL                        | 0.99-3.55<br>mg/mL                       | 1.49-5.37<br>mg/mL     |

<sup>a</sup> Another smaller peak indicated the digestion of **1b** can also be found in LC trace.

<sup>b</sup> The volume of a single HeLa cell ranges 760-2730 μm<sup>3</sup>.

<sup>c</sup> Method to calculate the concentration:

We inject 0.1 μL of the standard sample **1b** at the concentration of 0.905 mg/mL and the corresponding integration area is 10746884 μV\*sec. That means the *absorbance intensity* of **1b** is 1.19 \* 10<sup>8</sup> μV\*sec/μg.

For each cell lysate sample, the *total integration area* = integration area \* (sample V / injection V) and the *calculated concentration* = (*total integration area* / *absorbance intensity*) / (cell number \* single cell volume).

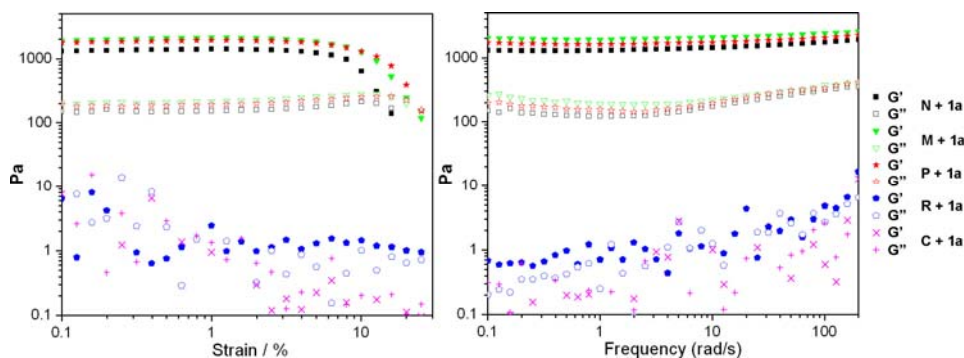

**Figure S4.** Rheological test of the mixture of each cell fraction with **1a** (final conc. =6mg/mL) 48 hrs after mixing. For the three self-supported hydrogel **N + 1a**, **M + 1a** and **P + 1a**, the value of  $G'/G''$  was around 10 which is the indication of a stable hydrogel. The curve of **R + 1a** flattened at higher strain percentage or lower frequency range, indicating it was a weak gel.  $G'$  and  $G''$  of **C + 1a** showed both strain and frequency dependent which suggested it behaved as a solution.

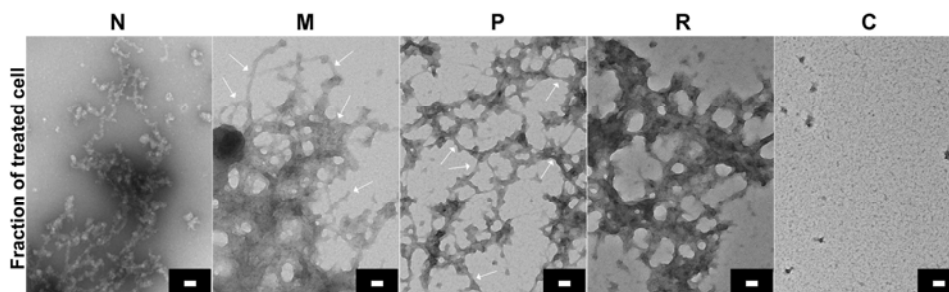

**Figure S5.** TEM images show the morphology of each fraction of HeLa cells which were pre-incubated with **1a** (500  $\mu$ M or 0.42 mg/mL) for 2 days. The typical nanofibers structure (indicated by white arrows, around  $10\pm 2$  nm in width) present in the fractions **M** and **P**. (Scale bars: 50 nm)

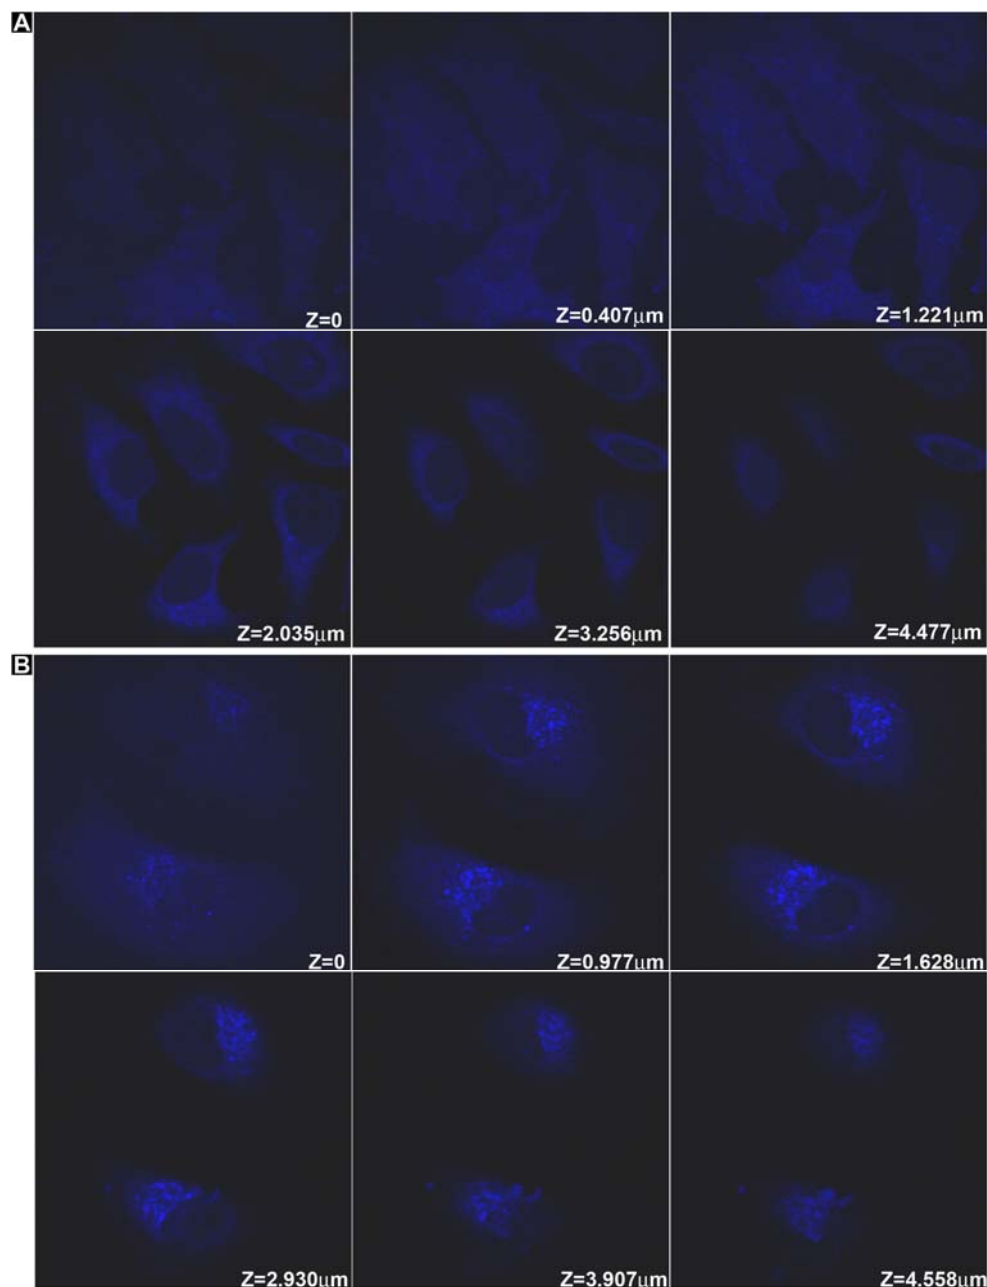

**Figure S6.** (A) Z-slices of a confocal image stack showing HeLa cells incubated with **2a** at 200 nM. Physical dimensions of each frame: 111  $\mu\text{m}$  x 111  $\mu\text{m}$ . (B) Z-slices of a confocal image stack showing HeLa cells incubated with both **2a** at 200 nM and **1a** at 500  $\mu\text{M}$ . Physical dimensions of each frame: 111  $\mu\text{m}$  x 111  $\mu\text{m}$ .

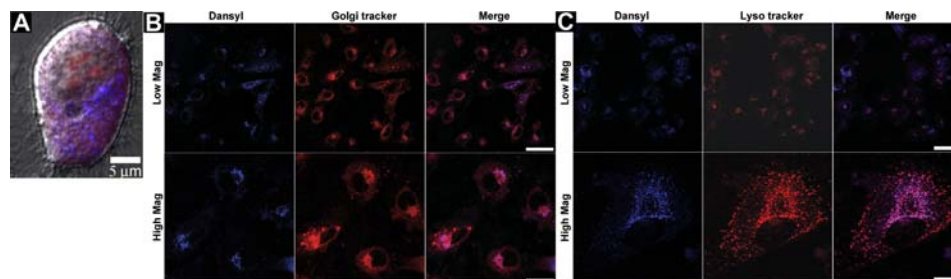

**Figure S7.** (A) Confocal image of a HeLa cell incubated under the same condition as in Fig. 3B, *i.e.* with fluorescent (dansyl: blue) **1a/2a** (500  $\mu$ M, 200 nM), and stained with SYTO<sup>®</sup> 85 fluorescent nucleic acid stain (red). (B) Co-staining with **1a/2a**-Dansyl (blue) and Golgi tracker (red). The concentrations of **1a** and **2a** in culture medium are the same as shown in Fig 3D. Scale bars: 50  $\mu$ m (top row); 20  $\mu$ m (bottom row). (C) Co-staining with **1a/2a**-dansyl (blue) and LysoTracker (red). The concentrations of **1a** and **2a** in culture medium are the same as shown in Fig 3D. Scale bars: 50  $\mu$ m (top row); 20  $\mu$ m (bottom row).

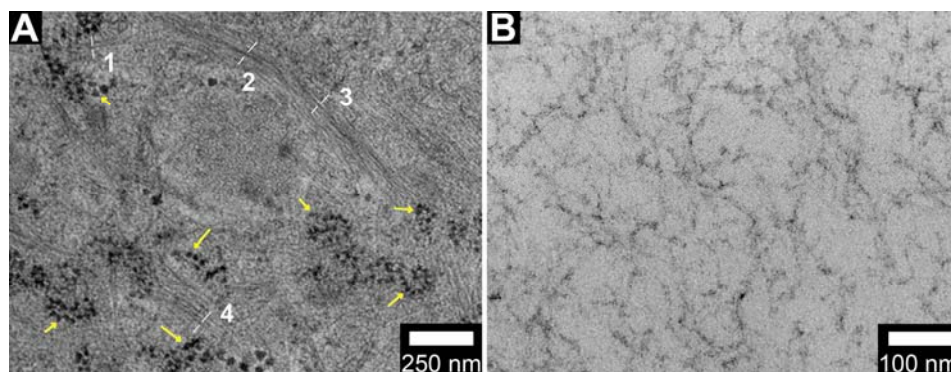

**Figure S8.** (A) TEM image of microtome section of a HeLa cell treated with 500  $\mu$ M of **1a** reveals the clusters of nanofibers structure. (Yellow arrows: ribosome; The fiber width measured at randomly picked point “1”, “2”, “3”, and “4”) The diameters of these nanofibers are  $12 \pm 2$  nm, agreeing with the width of the nanofibers in the hydrogels of **1b** *in vitro*. (B) A TEM image showing the typical morphology in the sample of the hydrogel of **1b** (0.6 wt%) mixing with 3.0 wt% agarose solution at the ratio of 1:1 (v/v). The procedure for the TEM sample preparation is the same as CLEM.

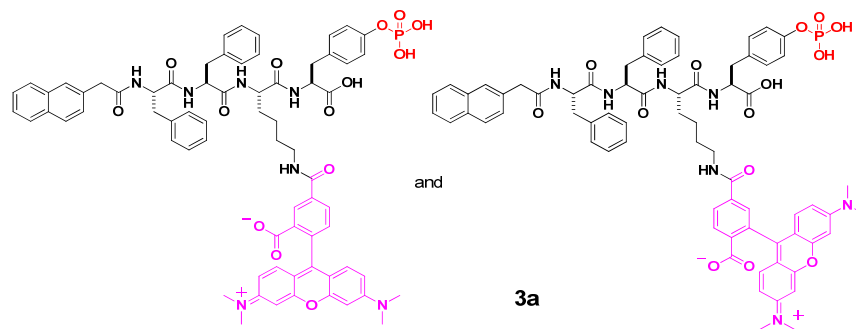

**Figure S9.** The molecular structure of **3a**. The commercial NHS-Rhodamine (Product No. 46406 from Thermo Scientific) is a mixture of 5-(and 6)-carboxytetramethylrhodamine, succinimidyl ester, which was used without the separation.

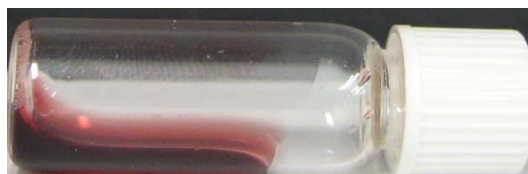

**Figure S10.** The optical image of a solution of **3a** (0.6 wt%, pH 7.4) which fails to form a hydrogel after dephosphorylation by ALP (20 U/mL).

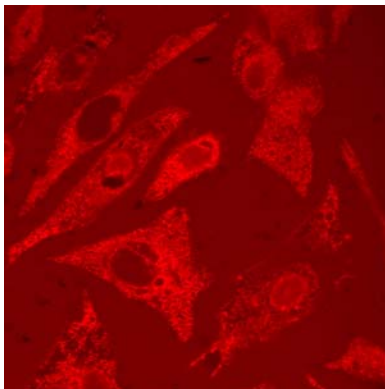

**Figure S11.** A typical fluorescent image shows that a group of HeLa cells incubated with 500  $\mu\text{M}$  of **3a** are homogeneously shown in red and there is no molecular agglomeration in ER region. (Dimension: 125  $\mu\text{m}$   $\times$  125  $\mu\text{m}$ ).
